1                    **Myosin-1b interacts with UNC45A and controls intestinal epithelial**  
2                    **morphogenesis**

3  
4  
5    **Running Title: Myo1b and gut development**

6  
7  
8    Céline Revenu<sup>1</sup>, Marianna Parlato<sup>2\*</sup>, Marion Rosello<sup>1,3\*</sup>, Karine Duroure<sup>1,3</sup>, Rémi Duclaux-  
9    Loras<sup>2</sup>, Ophélie Nicolle<sup>5</sup>, Marie-Thérèse Prospéri<sup>4</sup>, Julie Stoufflet<sup>1</sup>, Juliette Vouigny<sup>1</sup>, Corinne  
10    Lebreton<sup>2</sup>, Priscilla Lépine<sup>4</sup>, Grégoire Michaux<sup>5</sup>, Nadine Cerf-Benssusan<sup>2</sup>, Evelyne Coudrier<sup>4</sup>,  
11    Filippo Del Bene<sup>1,3</sup>

12  
13  
14    <sup>1</sup>Institut Curie, PSL Research University, INSERM U934, CNRS UMR3215, 75248 Paris Cedex  
15    05, France.

16    <sup>2</sup>INSERM, UMR1163, Laboratory of Intestinal Immunity and Institut Imagine, 75015 Paris,  
17    France.

18    <sup>3</sup>Sorbonne Université, INSERM, CNRS, Institut de la Vision, F-75012 Paris, France

19    <sup>4</sup>Institut Curie, PSL Research University, CNRS UMR144, 75248 Paris Cedex 05, France.

20    <sup>5</sup>CNRS, UMR6290, Institut de Génétique et Développement de Rennes, F-35043 15 Rennes,  
21    France.

22    \* equal contributions

23    ‡Author for correspondence: [filippo.del-bene@inserm.fr](mailto:filippo.del-bene@inserm.fr)

24  
25  
26  
27  
28  
29  
30    **Keywords:**

31    Myosin 1b, intestine, zebrafish, UNC45A, villous atrophy

33 **Summary statement (max 30 words)**

34

35

36 Myosin-1b is important for intestinal epithelium folding during zebrafish development and  
37 participates in the villous atrophy clinical manifestation downstream UNC45A loss of function.

38

39

40 **Abstract**

41

42

43 Vesicle trafficking and the establishment of apico-basal polarity are essential processes in  
44 epithelium morphogenesis. Myosin-1b, an actin-motor able to bind membranes, regulates  
45 membrane shaping and vesicle trafficking. Here, we investigate Myosin-1b function in gut  
46 morphogenesis and congenital disorders using cell line and zebrafish larvae as well as patient  
47 biopsies. In a 3D Caco-2 cyst model, lumen formation is impaired in absence of Myosin-1b. In  
48 zebrafish, both Morpholino knock-down and genetic mutation of *myo1b* result in intestinal bulb  
49 epithelium folding defects associated with vesicle accumulation, reminiscent of a villous atrophy  
50 phenotype. We show that Myosin-1b interacts with the chaperone UNC45A, genetic deletion of  
51 which also results in gut folding defects in zebrafish. Loss of function mutations in *UNC45A* have  
52 been reported in complex hereditary syndromes, notably exhibiting intestinal disorders associated  
53 with villous atrophy. In *UNC45A*-depleted cells and in patient biopsies, Myosin-1b protein level  
54 is strikingly decreased. The appearance of Myosin-1b aggregates upon proteasome inhibition in  
55 cells points at a degradation mechanism of misfolded Myosin-1b in the absence of its chaperone.  
56 In conclusion, Myosin-1b plays an unexpected role in the development of the intestinal epithelium  
57 folds or villi downstream *UNC45A*, establishing its role in the gut defects reported in *UNC45A*  
58 patients.

59

60

## 61 **Introduction**

62

63 The establishment of apico-basal polarity and lumen formation are two fundamental steps during  
64 vertebrate intestinal epithelial morphogenesis (Chin et al., 2017). The actin cytoskeleton and the  
65 vectorial vesicle trafficking play a major role in the initiation and maintenance of this process,  
66 leading to a stable single layer of cells with distinct apical and basolateral domains (Lubarsky and  
67 Krasnow, 2003, Martin-Belmonte and Mostov, 2008). The apical membrane of the enterocyte is  
68 further organized in microvilli, plasma membrane protrusions, which are supported by bundles of  
69 parallel actin filaments and interacting proteins interconnected at the basis through a network of  
70 actin, spectrin, and myosins known as terminal web (Revenu et al., 2004). The interaction between  
71 neighboring polarized cells is further strengthened by the formation of cadherin-based adherens  
72 junctions and claudin-based tight junctions. A proper polarization of the intestinal epithelium is  
73 essential to achieve its main physiological roles, such as fluids and nutrient absorption and  
74 secretion. Indeed, defects in intestinal epithelial cell polarity and apical lumen formation result in  
75 early onset intestinal disorders, usually appearing in the first days of life (Kwon et al., 2020).  
76 Recently, loss of function (LOF) mutations in the chaperone *UNC45A* were reported in families  
77 presenting complex phenotypes including congenital diarrhea and several degrees of villous  
78 atrophy (Esteve et al., 2018). *UNC45A* belongs to the conserved UCS protein family (*UNC-*  
79 *45/CRO1/She4p*) of myosin co-chaperones.

80 Myosins 1 are single-headed actin motors targeted to membranes. Myosin1b (*Myo1b*) was detected  
81 in mouse enterocyte brush borders in a mass spectrometry analysis (Revenu et al., 2012). Studies  
82 in cell cultures reported that *Myo1b* associates with organelles and regulates membrane trafficking  
83 by controlling their morphology (Almeida et al., 2011). *Myo1b* can pull out membrane tubes along  
84 actin bundles immobilized on a solid substrate (Yamada et al., 2014) and it controls the formation  
85 of repulsive filopodia, the redistribution of actomyosin fibres driving cell repulsion (Prosperi et al.,  
86 2015) as well as the formation of axons in cultured neurons by controlling actin waves (Iuliano et  
87 al., 2018). Despite this progress in understanding *Myo1b* function *in vitro* and in cellular systems,  
88 its function in tissue biology, especially in the intestinal epithelium where it is expressed, remains  
89 unexplored. This work investigates this question in the context of gut epithelia development and  
90 morphogenesis.

91

92 Here we show that *Myo1b* is one of *UNC-45A* interactors, suggesting a role for myosin1b in the  
93 pathogenesis of *UNC45A* deficiency. *Myo1b* localizes at the apical brush border of intestinal  
94 epithelial cells in humans and loss of *Myo1b* in enterocyte like Caco-2 cells impairs epithelial

95 morphogenesis. In zebrafish, genetic inactivation of Myo1b affects intestinal bulb fold formation  
96 revealing its conserved function during normal intestinal epithelia development.

97

## 98 **Results**

99

### 100 **Myo1b is expressed in the gut epithelium and concentrates apically**

101 Myo1b gene expression and protein localization were analyzed in intestinal epithelial cells. Myo1b  
102 was detected by Western Blot and immunofluorescence in the human epithelial colorectal Caco-2  
103 cells (Fig. 1A-B). It accumulated apically in polarised Caco-2 cysts, as demonstrated by its  
104 colocalisation with the F-actin marker phalloidin demonstrating a localisation in actin-rich area,  
105 microvilli and/or the subjacent terminal web (Fig. 1B). As this model is adenocarcinoma cells, this  
106 expression and localization patterns could be the result of the tumoral state. To investigate Myo1b  
107 distribution *in vivo*, we looked for the homologue of *myo1b* in the zebrafish *Danio rerio*. There is  
108 one single *myo1b* gene with several splicing isoforms in the current zebrafish genome assembly.  
109 The corresponding Myo1b protein shares 80% identity with the *Homo sapiens* and *Mus musculus*  
110 homologues (Fig. 1C). In order to determine the expression pattern of *myo1b* during zebrafish  
111 development, we performed whole mount *in situ* hybridization labelling with specific antisense  
112 probes. *Myo1b* transcripts were unambiguously detected at 3dpf in the digestive tract of zebrafish  
113 (Fig. 1D) coinciding with the onset of gut morphogenesis (Ng et al., 2005, Wallace et al., 2005).  
114 *Myo1b* transcripts were also observed at 5dpf (Fig. 1D) when the intestine becomes functional and  
115 compartmentalised in bulb, mid and posterior intestines. At this stage, the transcripts were  
116 restricted to the intestinal bulb, the anterior part of the gut that forms large folds. Due to the lack  
117 of a zebrafish specific antibody, endogenous Myo1b sub-cellular localisation could not be assessed  
118 in zebrafish larvae. However, expressing eGFP-tagged Myo1b revealed apical accumulation of the  
119 protein, as previously seen in Caco-2 cysts by immunofluorescence (Fig. 1E).

120 Myo1b is thus expressed in human intestinal epithelial cells and in the developing zebrafish  
121 intestinal bulb epithelium, and it preferentially localises apically in the brush border.

122

### 123 **Myo1b loss of function Caco-2 cysts show normal apico-basal polarization but altered** 124 **luminal development.**

125 To address the function of Myo1b in enterocyte polarisation, *myo1b* was knocked-out using  
126 CRISPR/Cas9 in Caco-2 cells (*myo1b* KO, Fig. 1 A-B). The global apico-basal polarity of Caco-

127 2 cysts was not affected in *myo1b* KO cells compared to controls as shown by the correct apical  
128 concentration of F-actin, pERM and villin (Fig. 2 A-B).

129 Despite the absence of major polarisation defects, *myo1b* KO Caco-2 cells were more prone than  
130 controls to the formation of cysts with multiple lumen (Fig. 2). Indeed, *myo1b* KO cells showed a  
131 50% drop in the percentage of well-formed cysts with single central lumen compared to controls  
132 (Fig. 2C).

133

### 134 ***Myo1b* loss of function has no major impact on epithelial cell differentiation of zebrafish** 135 **intestinal bulb**

136 To investigate the implication of Myo1b in intestinal epithelium morphogenesis *in vivo*, we turned  
137 to zebrafish as a good model for gut development. The zebrafish intestinal epithelium differentiates  
138 from 3 days post fertilisation (dpf) where it is essentially a flat monolayered tube. At 5dpf,  
139 epithelial folds are present, especially in the anterior most part of the gut, the intestinal bulb  
140 (Wallace et al., 2005). These folds are equivalent to the mammalian villi, and although no crypts  
141 are present in zebrafish, the region between folds will have a crypt-like role (Crosnier et al., 2005).  
142 First, we designed a splice blocking Morpholino (*Myo1b*-MO) that is efficiently preventing proper  
143 splicing of *myo1b* as determined by RT-PCR (supplemental Fig. 1A-B). At the concentration used,  
144 *Myo1b* MO displayed no overt phenotype, despite occasionally a slight heart oedema  
145 (supplemental Fig. 1C). To extend these results with a genetic loss of function model, we also  
146 generated a mutated allele at the *myo1b* locus using the CRISPR/Cas9 system, resulting in the  
147 insertion of a single base at the beginning of the open reading frame, as confirmed by sequencing  
148 (supplemental Fig. 1D). This leads to a premature stop codon and to the lack of detection of the  
149 protein by Western blot in gut lysates from adult homozygote mutants (*myo1b*<sup>-/-</sup>, supplemental  
150 Fig. 1E). As *myo1b* mRNA is maternally provided (supplemental Fig. 1F), maternal contribution  
151 was suppressed by crossing *myo1b*<sup>-/-</sup> mothers. As for the MO injections, the resulting maternal-  
152 zygotic homozygous mutant larvae displayed no overt phenotype (supplemental Fig. 1C). In cross-  
153 sections (Fig. 3A), the intestinal bulbs of *Myo1b* MO and *myo1b*<sup>-/-</sup> larvae appeared smaller  
154 compared to controls. A significant reduction of the number of cells per cross-section was observed  
155 for both *Myo1b* MO and *myo1b*<sup>-/-</sup> intestinal bulbs at 3 and 5dpf compared to their respective  
156 controls (Fig. 3B). A reduction in the total cell number in the intestinal bulb could be the  
157 consequence of increased apoptosis or reduced cell proliferation. No significant difference with  
158 controls in the proportion of proliferative cells could be detected at 3 and 5dpf (supplemental Fig.  
159 2A). A slight increase in the proportion of apoptotic cells could be detected at 5dpf but not at 3dpf  
160 (supplemental Fig. 2B). This later increase in apoptosis can however not account for the reduced

161 cell number per section reported from 3dpf on and could more be a readout of increased cellular  
162 stress level upon prolonged absence of Myo1b, as reported after the KO of other Myosins 1 in  
163 mouse and drosophila (Hegan et al., 2007, Tyska et al., 2005). Using specific markers for secreting  
164 and absorptive cell lineages, defects in enterocyte differentiation could also be excluded  
165 (supplemental Fig. 2 C-D). Finally, the microvilli marker Villin appeared properly localised  
166 apically, lining the lumen together with F-actin (Fig. 3C), suggesting that apical polarity is not  
167 affected in Myo1b MO and *myo1b*<sup>-/-</sup> intestinal epithelium *in vivo*, as already shown in 3D Caco-  
168 2 cell cultures (Fig. 2B).

169

### 170 ***Myo1b* loss of function zebrafish display MVID-like features in the intestinal bulb epithelium**

171 To analyse in 3D intestinal bulb epithelium morphogenesis in zebrafish, we used the BAC line  
172 *cldn15la:cldn15la-GFP* that specifically labels the gut epithelium (Alvers et al., 2014). Both MO  
173 and KO intestinal bulbs revealed single continuous lumen suggesting that early steps of lumen  
174 fusion events were not affected (Alvers et al., 2014, Horne-Badovinac et al., 2001). However, in  
175 Myo1b MO larvae, the intestinal bulb epithelium appeared most of the time flat at 5dpf, not  
176 developing the expected folds observed in controls (Fig. 3D). Consistently with this phenotype, in  
177 the KO model, we detected a significant reduction in fold length in KO versus control samples  
178 (Fig. 3E). In an attempt to understand this milder phenotype in the mutant compared to the MO  
179 condition, we analysed potential compensation mechanisms by other myosins 1 performing RT-  
180 QPCR. On the 4 myosins 1 tested (*myo1ca*, *myo1cb*, *myo1d* and *myo1eb*), *myo1eb* showed a  
181 reproducible increase of on average 60% of the WT expression level in the mutant using EF1a  
182 (supplemental Fig. 1G) and RPL13a (not shown) as reference genes. *Myo1eb* is broadly expressed  
183 in early developmental stages but has restricted expression patterns after 2dpf (mostly branchial  
184 arches and pharynx) (Thisse and Thisse, 2004). A partial compensation of the loss of *myo1b* by an  
185 upregulation of *myo1eb* could thus potentially explain the subtler and more restricted phenotype of  
186 the mutant larvae compared to the knock-downs.

187 To further characterize the architecture of Myo1b-deficient intestinal bulb epithelium, a  
188 histological analysis by transmission electron microscopy (TEM) was performed on 5dpf larvae.  
189 It confirmed the affected folding of the intestinal bulb epithelium in MO and KO samples, and the  
190 preserved apico-basal polarity of enterocytes (Fig. 4A-B). Quantifying microvilli length and  
191 density did not reveal any significant defect resulting from Myo1b downregulation or absence,  
192 although packing looked less regular (Fig. 4C). In contrast, a darker sub-apical band was visible  
193 in Myo1b affected samples compared to controls, likely corresponding to modifications of the  
194 terminal web (Fig. 4C). Moreover, this ultrastructural analysis showed an important accumulation

195 of vesicles in MO and KO samples compared to controls (Fig. 4B insets) suggesting defects in  
196 membrane trafficking. These TEM observations (epithelium folding impaired, modifications of  
197 the apical pole ultrastructure and trafficking defects) overall indicate that myo1b-deficient  
198 enterocytes display some microvillus inclusion disease-like features.

199

### 200 **Myo1b is destabilized when Unc45A is affected**

201 Loss of function (LOF) mutations in the chaperone *UNC45 homolog A* have recently been  
202 associated with rare human genetic syndromes notably presenting intestinal disorders, including  
203 chronic diarrhea and villous atrophy of variable penetrance (Esteve et al., 2018). A pull-down  
204 assay performed to detect potential Myo1b partners identified UNC45A as the most abundant  
205 protein interacting with Myo1b in a mouse neuronal cell model (Supplementary table 1). This  
206 interaction was confirmed by the reverse experiment using UNC45A as bait in the colorectal Caco-  
207 2 cells (Duclaux-Loras *et al.*, submitted).

208 Considering this interaction, we investigated the impact of *UNC45A* depletion on Myo1b  
209 expression. *UNC45A* depleted Caco-2 cells showed reduced Myo1b levels by  
210 immunofluorescence (Fig. 5A). To detect aggregation-prone proteins normally sent to  
211 degradation, the proteasome machinery was blocked using the proteasome inhibitor MG132.  
212 MG132 induced the appearance of protein aggregates both in control and UNC45A KO Caco-2  
213 cells (Fig. 5B). Myo1b staining partly co-localised with the aggresomes in the UNC45A KO  
214 condition (Fig. 5B). This result suggests that Myosin1b proper folding requires the chaperone  
215 UNC45A.

216 We finally looked at Myo1b expression in duodenal biopsies from control and *UNC45A* loss of  
217 function patients. In control biopsies, the microvilli marker Villin was expressed apically all along  
218 the epithelium and Myo1b was detected apically at the base of the villi and in crypts, partially  
219 colocalising with Villin (Fig. 5C). In *UNC45A* patients, Villin was still localised apically whereas  
220 Myo1b was barely detectable (Fig. 5D). In conclusion, Myo1b protein level is decreased in  
221 *UNC45A*-depleted cells and in duodenal biopsies from an *UNC45A*-mutated patient.

222

### 223 **Discussion**

224

225 This work identifies Myo1b, an actin motor, as an unexpected player in the regulation of the  
226 morphogenesis of the intestinal epithelium during gut development. In zebrafish, we report defects  
227 in epithelial folding and villous atrophy when Myo1b is impaired. This phenotype is similar to the

228 ones reported in zebrafish and in human patients with loss of function mutations in *UNC45A*. We  
229 show that Myo1b interacts with UNC45A and that Myo1b is destabilised in absence of UNC45A.

230

231 For this study, we analysed both *myo1b* mutant- and Morpholino-induced phenotypes. It is now  
232 well established that Morpholino knock-downs often result in more severe overt phenotypes than  
233 the corresponding knock-outs, at least partially due to the induction of genetic compensation  
234 mechanisms in the mutants (Kok et al., 2015, Rossi et al., 2015). In the *myo1b* null case, we  
235 observed a more subtle outcome than the Mopholino, which could be due to compensation  
236 mechanisms (El-Brolosy and Stainier, 2017) as supported by the RT-QPCR of *myo1eb*. Here, the  
237 intestinal bulb phenotypes observed with both approaches converged on reduced cell number of  
238 intestinal bulb sections and impaired epithelial folding.

239

240 Up to now, myosins 1a, c, d and e had been identified in intestinal brush borders constituting the  
241 apical pole of differentiated enterocytes (Benesh et al., 2010). Several class I myosins have been  
242 implicated in the maintenance of intestinal epithelial differentiated state. Myo1a, which is  
243 associated with the highly organised actin network of differentiated enterocytes in mammals  
244 (Revenu et al., 2012, Tyska et al., 2005), but seems to lack in the zebrafish and *Drosophila*  
245 genomes, is important for enterocyte polarity and participates in the structure and composition of  
246 the brush border (Mazzolini et al., 2012, Tyska et al., 2005). The phenotype of the *myo1a* KO mice  
247 is however mild, with reports of clear compensations by other class I myosins (Benesh et al., 2010,  
248 Tyska et al., 2005). Likewise, two of the known class I myosins in *Drosophila* are also localised  
249 in the apical pole of differentiated enterocytes and *Drosophila* Myo61F is necessary for the  
250 stability of enterocyte apical organisation (Hegan et al., 2007). We report the expression of another  
251 myosin 1 in the gut epithelium, Myo1b, and its apical localisation in enterocytes of Human  
252 biopsies, of zebrafish intestinal bulb and in Caco-2 cells. Myo1b localisation in microvilli had  
253 previously been reported in kidney epithelial cells (Komaba and Coluccio, 2015). In Human  
254 biopsies, Myo1b is expressed at the base of the villi and in crypts suggesting a specific role in the  
255 proliferative compartment and not in enterocyte differentiated state. We did not detect global  
256 polarisation defects at the cell level or impaired differentiation in absence of Myo1b, whereas both  
257 the Caco-2 3D model and the zebrafish model demonstrate morphogenetic defects at the tissue  
258 level, respectively single lumen formation and folding.

259

260 Proliferation, apoptosis or differentiation defects do not account for the reduced cell number  
261 observed on transverse sections of the intestinal bulb from 3dpf. As the sections give a 2D



262 overview of a 3D organ, this reduced cell number is thus likely the readout of the different  
263 organisation in space of the epithelium. A specificity of the zebrafish intestinal bulb is the early  
264 folding of the epithelium that remains pronounced to adulthood (Ng et al., 2005). The reduced  
265 folding and villi formation in the mutants and morphants are clear signs of a different architecture  
266 of the tissue. Also the mechanisms underlying intestinal epithelium folding are not yet fully  
267 understood, the impact of tension and forces at the cell and tissue level driving compression, cell  
268 intercalation and invagination through apical constriction have been investigated in other tissues  
269 during development (Mammoto and Ingber, 2010). Myosins are central in the control of actin  
270 cytoskeleton dynamics and in force generation (Reymann et al., 2012). In particular, Myo1b  
271 deforms membranes and participates in organelle formation and trafficking (Almeida et al., 2011,  
272 Coudrier and Almeida, 2011). It also remodels the actin cytoskeleton (Iuliano et al., 2018, Pernier  
273 et al., 2019, Prosperi et al., 2015). Its roles in membrane traffic and in the dynamic organisation of  
274 actin structures make it a plausible actor in the morphogenesis of the gut epithelium. The electron  
275 microscopy data show a strong accumulation of intra-cellular vesicles in Myo1b mutant and  
276 Morpholino tissues suggesting impaired trafficking, in agreement with its role in the formation of  
277 post Golgi carriers and protein transport at the level of multivesicular endosomes (Almeida et al.,  
278 2011, Salas-Cortes et al., 2005). Electron microscopy also reveals modifications of the terminal  
279 web area, the apical actin belt linking adherens junctions in the epithelium, in agreement with its  
280 role in actin dynamics. Myosin 1b function on actin dynamics and consequently on membrane  
281 remodelling and membrane trafficking must impact cell and tissue mechanics (Buske et al., 2012),  
282 and this way contributes to impaired intestinal epithelial folding in the absence or down-regulation  
283 of *myo1b*. Myo1b restricted localisation at the base of the villi in human biopsies may indicate a  
284 specific mechanical role in crypts morphogenesis.

285  
286 Villous atrophy is a phenotype associated with various intestinal disorders including some rare  
287 hereditary syndroms presenting congenital diarrhea like microvillous inclusion disease (MVID).  
288 Mutations in MyosinVb are the main cause of MVID (Muller et al., 2008) and have notably been  
289 associated with defective trafficking. A zebrafish mutant of *myoVb* develops a flat intestinal  
290 epithelium (Sidhaye et al., 2016). Recently, loss of function (LOF) mutations in the chaperone  
291 *UNC45A* were reported in families presenting complex phenotypes including congenital diarrhea  
292 and several degrees of villous atrophy (Esteve et al., 2018). A zebrafish mutant for *UNC45A* also  
293 exhibit loss of intestinal epithelium folding (Esteve et al., 2018). *UNC45A* is a chaperone  
294 participating in the conformational maturation of, among others, some Myosins (Barral et al.,  
295 2002, Lee et al., 2014, Lehtimaki et al., 2017). Our results in human cell lines and in patient

296 samples demonstrate a strong reduction in the protein level of Myo1b in absence of a functional  
297 UNC45A variant, probably due to the degradation of misfolded and destabilised Myo1b. Myo1b  
298 proper conformational folding would thus require the chaperone UNC45A. The intestinal  
299 phenotypes associated with LOF mutations in *UNC45A* could hence partly be the consequence of  
300 the reduced protein level of Myo1b. In conclusion, Myo1b contributes to gut morphogenesis and  
301 appears as a potential player in the complex intestinal phenotype of the UNC45A LOF syndrome.

302  
303

## 304 **Materials and Methods**

305

306 **CRISPR- Cas9 genome editing of MYO1B in Caco2 cells and 3D culture.** The lentiCRISPRv2  
307 plasmid was a gift from F. Zhang (Massachusetts Institute of Technology, Boston, MA; plasmid  
308 no. 98290, Addgene). The single-guide RNAs (sgRNAs) were designed using the CRISPR Design  
309 Tool (Massachusetts Institute of Technology) and cloned into the BsmBI site. sgRNA sequences:  
310 for-5- CACCGATCCCTACGAGATCAAGATA -3, rev-5- AAAC TA TCT TGA TCT CGT  
311 AGG GAT C -3. Following production of lentiviral particles, the lentiCRISPRv2 plasmids were  
312 transduced in Caco2 cells. Positively transduced cells were selected by puromycin (10µg/ml).  
313 For 3D culture, CaCo2 cells were resuspended at a concentration of 10<sup>4</sup> cells/mL in DMEM  
314 (Gibco) with 20% FCS containing 4% Matrigel (BD Biosciences) and 2.5 10<sup>4</sup> cells/well were  
315 plated in 8-wells chamber slide IBIDI (Biovalley), previously precoated with 100 µL of Matrigel.  
316 Cells were grown for 5 days to obtain cysts. To detect aggregation-prone proteins, the proteasome  
317 inhibitor MG132 (Sigma-Aldrich) was added overnight in the culture medium at a concentration  
318 of 10 µM.

319

320 **Western blot.** Caco-2 cells were lysed in RIPA buffer (Sigma) supplemented with 1X proteinase  
321 inhibitor cocktail mix (Roche, Sigma). Adult zebrafish guts were dissected on ice and mechanically  
322 lysed in 200µL lysis buffer (10 mM HEPES + 300 mM KCl + 5 mM MgCl<sub>2</sub> + 0,45% triton X100  
323 + 0,05% Tween20, pH7) with 10 mM ATP and Complete protease inhibitor (Roche). 40 µg of  
324 extracts in Laemmli buffer were loaded on a 4-12% polyacrylamide gradient concentration gel  
325 (ThermoFisher). Primary antibodies used were mouse anti-tubulin (1:12000, Sigma), rabbit anti-  
326 ratMyo1b (1,8 µg/µL, 1:500, (Salas-Cortes et al., 2005), anti GAPDH (1:1000, Cell Signaling).

327

328 **Phylogenetic analysis.** The Myo1b and Myo1a homologues in *Danio rerio*, *Homo sapiens*, *Mus*  
329 *Musculus*, *Gallus gallus* and *Drosophila melanogaster* were obtained from NCBI HomoloGene.  
330 Protein sequences were aligned and a phylogenetic tree was assembled using the online ‘One  
331 Click’ mode at Phylogeny.fr (Dereeper et al., 2008).

332

333 **Molecular Cloning.** The *βactinhsp70:KalT4;cmcl2:eGFP* construct was generated by combining  
334 four plasmids using the Multisite Gateway system (Invitrogen): p5E-*βactinhsp70*, pME-KalT4,  
335 p3E-polyA and pDEST-cmcl2:eGFP containing Tol2 sites (Kwan et al., 2007). The *βactin*  
336 promoter was cloned into the pCR-bluntII-TOPO vector (Invitrogen) and then inserted in the p5E-  
337 MCS using KpnI and XhoI restriction sites. The 3’ 638bp of the zebrafish *hsp70* promoter (Dalgin  
338 et al., 2011) was inserted into this p5E-*βactin* vector linearized with XhoI using the Gibson  
339 Assembly Cloning Kit (New England Biolabs). The optimised Gal4 KalT4 (Distel et al., 2009)  
340 was amplified and inserted in a pDONR221 using the Multisite Gateway system (Invitrogen).

341 To generate the *14UAS:ubc-eGFP-Myo1b* vector, eGFP-Rat Myo1b cDNA was amplified from a  
342 previously published plasmid (Prosperi et al., 2015). It was inserted into the pT1UciMP plasmid  
343 containing 14xUAS-ubc and Tol1 sites (Horstick et al., 2015) linearized with XhoI using the  
344 Gibson Assembly Cloning Kit (New England Biolabs).

345

346 **Zebrafish (*Danio rerio*) husbandry.** Wild-type Tupfel long fin zebrafish strains were used and  
347 raised according to standard protocols. Stable transgenic lines were generated by injection of the  
348 plasmids with *tol2* or *tol1 transposase* mRNA at 25ng/μL in one-cell stage zebrafish embryos. The  
349 transgenic BAC line claudin15-like-a fused to GFP (*cldn15la:cldn15la-GFP*) was kindly provided  
350 by Michel Bagnat (Alvers et al., 2014).

351 For live-imaging, larvae were anaesthetised in 0.02% MS-222 and immobilised in 1% low melting  
352 point agarose. Imaging was performed on a Zeiss LSM 780 confocal. All animal procedures were  
353 performed in accordance with French and European Union animal welfare guidelines.

354

355 **In situ hybridization.** *In situ* hybridizations (ISH) were performed on larvae treated with 1-  
356 phenyl-2-thiourea (PTU, Sigma-Aldrich) and fixed in freshly made 4% paraformaldehyde (PFA)  
357 2-4h at RT and stored in 100% methanol at -20°C. After rehydration, larvae were treated with  
358 proteinase K (20 μg/ml; Roche diagnostics) at RT for 1h (3dpf) or 2h (5dpf) and fixed again in 4%  
359 PFA at RT for 20min. Digoxigenin-labelled antisense and sense RNA probes were synthesized by  
360 *in vitro* transcription using DIG-labelled UTP according to the manufacturer's instructions (DIG  
361 RNA labelling kit, Roche). Primers used were as follow: *myo1b* sense: CAA TAT GAT AGG

362 GGT AGG GGA CAT G ; antisense: TGG TTT GAA CTC AAT ATT TCC CAG C. Anti-DIG  
363 antibody conjugated to alkaline phosphatase allowed detection of hybridized riboprobes according  
364 to the manufacturer's instructions (Roche).

365

366 ***Myo1b* zebrafish mutant generation with CRISPR/Cas9.** The sgRNA sequence (sgB:  
367 CTTCTGACAAGGGCTCTAGG) was cloned into the BsaI digested pDR274 vector (Addgene).  
368 The sgRNAs were synthesized by *in vitro* transcription (Megascript T7 transcription kit, Ambion).  
369 After transcription, sgRNAs were purified using the RNAeasy Mini Kit (Quiagen). For injections  
370 at one cell stage, the synthesized sgB was injected at 300ng/ $\mu$ L after 5-minute incubation at RT  
371 with Cas9 protein (NEB) at 2 $\mu$ M final in 20mM Hepes-NaOH pH 7.5, 150mM KCl (Albadri et al.,  
372 2017). Injected embryos were grown to adulthood and crossed with wild-types to identify founders.  
373 Pools of 20 embryos per clutch were lysed in NaOH 50mM at 95°C for at least 30min. PCR was  
374 performed on lysates to amplify the genomic region targeted by the sgB with primers forward  
375 5'GGGTGTTGTTTCAGCGATGGA and reverse 5'ATAGATCTCATTGTGATCGA using  
376 Phusion High-Fidelity DNA polymerase (Thermo Scientific). The amplicons were cloned in pCR-  
377 bluntII-TOPO vector (Zero Blunt Topo PCR cloning kit, Invitrogen) and sequenced (GATC  
378 Biotech) to identify indels and the corresponding founder fish. Sequences were analysed using  
379 Geneious. After selection of the founder, genotyping of the line was performed by PCR on fin clips  
380 with primers 5'AGATGAATGCAAGCAAGCCATT and  
381 5'ATACGATCTGATTGTGATCGAATCGCT. The resulting product was digested with  
382 restriction enzyme FspBI, the site of which is lost in the mutant, resulting in 2 fragments (208 and  
383 66bp) for the WT allele and only one (275bp) for the mutated allele.

384

385 **Morpholino oligonucleotide design and injections.** *Myo1b* splice blocking morpholino was  
386 designed to target the splice donor site downstream of exon 22 (*Myo1b*-MO, 5'-  
387 ATGAGAAACTGTGTTTCATTACCTGG). Experiments were performed in parallel with a  
388 standard control-MO (5'-CCTCCTACCTCAGTTACAATTTATA) with no target in the zebrafish  
389 genome. Morpholinos (Gene Tools) diluted at 1mM in water, were injected in 1-cell stage embryos  
390 at a final concentration of 0.2mM. To validate *Myo1b*-MO knock-down, RT-PCR was performed  
391 on 3dpf larvae. Total RNA of 50 larvae was prepared with TRIzol and TURBO DNase-free  
392 reagents (Invitrogen). mRNA (1 $\mu$ g) was retro-transcribed using oligo(dT) primers and the  
393 SuperScript III First-Strand Synthesis System (Invitrogen). To amplify the region targeted by the  
394 MO (supplemental Fig. 1A), PCR was performed on the cDNA with two different forward primers

395 (primer 1 in exon21 was: 5'GGCTGCGATATTCTTGCCTCC, primer 2 at the edge of exon22 and  
396 the targeted intron was: 5'TCTTTCATTCGTGGATGGAAGGCC) and the reverse primer  
397 5'AACCCAGGTAATGAACACAGTTTCTAT. PCR products were run on a gel (supplemental  
398 Fig. 2B) and bands were gel purified (Macherey-Nagel), inserted in a pCR-bluntII-Topo vector  
399 (Invitrogen) and sent for sequencing (GATC) to assess intron retention.

400

401 **Quantitative RT-PCR.** For each experiment, total RNA was prepared from 3 pools of 50 embryos  
402 per phenotype with TRIzol reagent and the TURBO DNA-free kit (ThermoFisher Scientific). RNA  
403 (1µg) was retro-transcribed using random primers and the SuperScript III First-Strand Synthesis  
404 system (ThermoFisher Scientific). For RT-QPCR, the SYBR Green PCR Master Mix  
405 (ThermoFisher Scientific) was used according to the manufacturer's instructions and PCR were  
406 performed on an ABI PRISM 7900HT instrument. Experimental triplicates of each sample were  
407 averaged and the relative expression level quantified with the log<sub>2</sub>ΔCT method using EF1a and  
408 RPL13a reference genes. Shown are values normalised on the wild-type samples.

409

410 **Immunohistochemistry.** Caco-2 cells and cysts were fixed in 4% PFA 30min at 37°C and washed  
411 with PBS. They were permeabilised in PBS, 0.2%TX100, 1%BSA for 5min at RT and blocked in  
412 PBS 3%BSA for 1-2 hours at RT. Primary antibodies used were rabbit anti-ratMyo1b (1,8 µg/µL,  
413 1:100, (Salas-Cortes et al., 2005), mouse anti-Villin clone ID2C3 (1:300, (Robine et al., 1985),  
414 rabbit anti-pERM (1:100, abcam ab47293). After washes, they were incubated with Alexa Fluor  
415 488 secondary antibody (Molecular probes), phalloidin-Alexa Fluor 568 and Dapi. To assess  
416 protein aggregation, the Proteostat Aggresome Detection Kit (ENZO, ENZ-51035) was used.  
417 Briefly, after the primary antibody rabbit anti-ratMyo1b, cells were incubated for 30min at RT with  
418 goat anti-rabbit-Alexa Fluor 635 antibody (1:400, Molecular probes), Proteostat 1:400 and Hoechst  
419 1:800 (ENZO) in PBS 3%BSA.

420 Zebrafish larvae were fixed for 2h at room temperature in 4% PFA and incubated in 30%  
421 sucrose/0.1% PBST overnight at 4°C. They were then frozen in Tissue-Tek OCT (Sakura) at -80°C  
422 and sectioned using a Cryostat (Leica). Zebrafish larvae sections were incubated in blocking buffer  
423 (10% serum in PBST, PBS 0.1%Tween20) and with mouse anti-Villin clone ID2C3 (1:300), mouse  
424 2F11 antibody (1:100, Abcam ab71286) or 4E8 (1:100, Abcam ab73643) overnight at 4°C. After  
425 washes with PBST, they were incubated with Alexa Fluor 488 secondary antibody (Molecular  
426 probes), phalloidin-Alexa Fluor 568 and Dapi. To assess apoptosis, TUNEL assay was performed  
427 with reaction solutions from ApopTag Red In situ Apoptosis detection kit (Millipore) according to

428 the manufacturer recommendations. To assess proliferation, larvae were injected in the yolk with  
429 10mM 5-ethynyl-2'-deoxyuridine (EDU) in 1% DMSO and incubated in 100 $\mu$ M EdU, 0.4%DMSO  
430 for 20 hours after injection. Animals were fixed at indicated time and processed according to the  
431 Click-iT EdU Imaging Kit (Invitrogen).

432 Paraffin embedded sections of intestinal tissues from a UNC45A deficient patient and biopsies  
433 from controls were obtained for diagnosis or therapeutic purposes. Duodenal biopsies were  
434 routinely fixed in 4% buffered formalin for 24 hours and paraffin-embedded. Sections were heated  
435 for 1hr at 65°C and paraffin was removed by two 5-min washes in xylene. Sections were then  
436 hydrated with ethanol solutions of decreasing concentrations. Unmasking of the epitopes was  
437 performed at 100°C for 20 min in Citrate-based Antigen Unmasking Solution (Vector  
438 Laboratories). Sections were incubated for 30 min at room temperature in blocking buffer (3%  
439 BSA in PBS) and then overnight at 4°C with anti Myo1b antibody (1:200, Novus Biologicals  
440 NBP1-87739) in blocking. After washes with PBST, sections were incubated with goat anti rabbit  
441 Alexa Fluor 488 antibody (Molecular probes), phalloidin-Alexa Fluor 568 and Dapi for 2hrs at  
442 RT.

443 After extensive washes and mounting in Vectashield (Vector Lab), all stainings were imaged on a  
444 LSM780 confocal microscope (Zeiss). Images were processed and numbers of cells quantified  
445 using ImageJ.

446

447 **TEM analysis on zebrafish larvae.** 5dpf larvae were collected and stored at 4°C in Trump's  
448 fixative. Enhanced chemical fixation was performed in a mix of 4% PFA with 2.5% glutaraldehyde  
449 in 0.1 mol/L cacodylate buffer overnight at 4°C. A 1.5-hour incubation in 1% OsO<sub>4</sub> was followed  
450 by a 1.5-hour incubation with 2% uranyl acetate at ambient temperature. Larvae were then  
451 dehydrated through graded ethanol solutions, cleared in acetone, infiltrated, and embedded in  
452 Epon-Araldite mix (EMS hard formula). We used adhesive frames (11560294 GENE-FRAME 65  
453  $\mu$ L; Thermo Fisher Scientific) for flat-embedding, as previously described (Kolotuev et al., 2012),  
454 to gain better anteroposterior orientation and sectioning. Ultrathin sections were cut on an  
455 ultramicrotome (UC7; Leica Microsystems) and collected on formvar-coated slot grids (FCF2010-  
456 CU, EMS). Each larva was sectioned transversally in five different places in intestinal bulb with  
457  $\geq 20$   $\mu$ m between each grid to examine the sample over a large region. Each grid contained at least  
458 4-6 consecutive sections of 70 nm. TEM grids were observed using a JEM-1400 transmission  
459 electron microscope (JEOL) operated at 120 kV, equipped with a Gatan Orius SC1000 camera  
460 (Gatan) and piloted by the Digital Micrograph program. Microvilli length and density were

461 quantified using Fiji on TEM pictures of at least 50 MV from 25 enterocytes of 3 larvae per  
462 condition.

463

464 **Pull Down assay.**  $10^6$  N1E115 cells were transfected with pEGFP Myo1b (Salas-Cortes et al.,  
465 2005) and lysed in TRIS 150mM, NaCl 150mM, EDTA 1mM, EGTA 1mM, ATP 10 mM, 10%  
466 glycerol, 1mM DTT, 0,5% triton and protease inhibitor 24 hours after transfection. The lysate was  
467 then incubated with 15 ml of GFP trap Beads (Chromotek) overnight. After washing the beads  
468 were resuspended in water and treated for mass spectrometry analysis.

469

470 **Statistical analysis.** The numbers of cells reported are coming from manual counting. No  
471 sample was excluded from the analysis, except for the total cell number per section where  
472 we made sure to analyse samples displaying single cell layers through the whole gut cross-  
473 sections and not the side of some villi. The sample size (n=) is defined as the number of larvae  
474 analysed (one section per larva). For statistical analysis, we applied the non-parametric  
475 Wilcoxon-Mann Whitney test.

476

477

478

#### 479 **Acknowledgements**

480 The authors thank the Del Bene team for fruitful suggestions and discussions and members  
481 of the Institut Curie zebrafish facility. The authors acknowledge all members from the PICT-  
482 IBiSA Lhomond Imaging Platform (UMR144) and the Cell and Tissue Imaging Platform of the  
483 Genetics and Developmental Biology Department (UMR3215/U934) of Institut  
484 Curie, member of France-Bioimaging (ANR-10-INSB-04), for help with light microscopy and  
485 the electron microscopy unit of the MRic facility (Rennes, France).

486

#### 487 **Competing Interests**

488 No competing interests declared.

489

#### 490 **Contributions**

491 MP generated the KO cells. JS and CR generated the *Myo1b* null allele in zebrafish. MR  
492 generated the stable zebrafish transgenic lines. CR performed immunofluorescence  
493 stainings. KD, JV and MR performed ISH. MP, MR, CR and RDL performed WB. KD and CR did

494 the RT-qPCR analysis. JS and JV genotyped the mutants. ON and GM did the TEM and analysis.  
495 MP, RDL and CL prepared cell culture samples. PL generated preliminary data with  
496 Morpholinos. MTP and EC performed the pull-down assay. CR analysed the results and wrote  
497 the paper. FDB, EC and NCB supervised the work. MR, MP, GM, EC and FDB edited the  
498 manuscript.

499

## 500 **Funding**

501 This work has been supported by Institut Curie, CNRS, INSERM and grants from the ANR  
502 (ANR-14-CE11-0005-03), ANR/e-RARE (ANR-12-RARE-0003-03) and the ARC foundation  
503 (grant n°SFI2012205571). E.C. group belongs to the CNRS consortium CellTiss and to the  
504 Laboratoire d'Excellence (LABEX) CelTisPhyBio 11-LBX-0038. FDB group is part of the  
505 LABEX DEEP 11-LABX-0044, and of the École des Neurosciences de Paris Ile-de-France  
506 network. CR was supported by a EU H2020 Marie Skłodowska-Curie Action fellowship  
507 (H2020-MSCA-IF-2014 #661527). MR was supported by the Fondation pour la Recherche  
508 Médicale (FRM grant number ECO20170637481).

509

510

## 511 **REFERENCES**

512

- 513 Albadri, S., Del Bene, F. & Revenu, C. 2017. Genome editing using CRISPR/Cas9-based knock-  
514 in approaches in zebrafish. *Methods*, 121-122, 77-85.
- 515 Almeida, C. G., Yamada, A., Tenza, D., Louvard, D., Raposo, G. & Coudrier, E. 2011. Myosin 1b  
516 promotes the formation of post-Golgi carriers by regulating actin assembly and  
517 membrane remodelling at the trans-Golgi network. *Nat Cell Biol*, 13, 779-89.
- 518 Alvers, A. L., Ryan, S., Scherz, P. J., Huisken, J. & Bagnat, M. 2014. Single continuous lumen  
519 formation in the zebrafish gut is mediated by smoothed-dependent tissue  
520 remodeling. *Development*, 141, 1110-9.
- 521 Barral, J. M., Hutagalung, A. H., Brinker, A., Hartl, F. U. & Epstein, H. F. 2002. Role of the myosin  
522 assembly protein UNC-45 as a molecular chaperone for myosin. *Science*, 295, 669-71.
- 523 Benesh, A. E., Nambiar, R., Mcconnell, R. E., Mao, S., Tabb, D. L. & Tyska, M. J. 2010. Differential  
524 localization and dynamics of class I myosins in the enterocyte microvillus. *Mol Biol*  
525 *Cell*, 21, 970-8.
- 526 Buske, P., Przybilla, J., Loeffler, M., Sachs, N., Sato, T., Clevers, H. & Galle, J. 2012. On the  
527 biomechanics of stem cell niche formation in the gut--modelling growing organoids.  
528 *FEBS J*, 279, 3475-87.
- 529 Chin, A. M., Hill, D. R., Aurora, M. & Spence, J. R. 2017. Morphogenesis and maturation of the  
530 embryonic and postnatal intestine. *Semin Cell Dev Biol*, 66, 81-93.
- 531 Coudrier, E. & Almeida, C. G. 2011. Myosin 1 controls membrane shape by coupling F-Actin  
532 to membrane. *Bioarchitecture*, 1, 230-235.



- 533 Crosnier, C., Vargesson, N., Gschmeissner, S., Ariza-Mcnaughton, L., Morrison, A. & Lewis, J.  
534 2005. Delta-Notch signalling controls commitment to a secretory fate in the zebrafish  
535 intestine. *Development*, 132, 1093-104.
- 536 Dalgin, G., Ward, A. B., Hao Le, T., Beattie, C. E., Nechiporuk, A. & Prince, V. E. 2011. Zebrafish  
537 *mxn1* controls cell fate choice in the developing endocrine pancreas. *Development*,  
538 138, 4597-608.
- 539 Dereeper, A., Guignon, V., Blanc, G., Audic, S., Buffet, S., Chevenet, F., Dufayard, J. F., Guindon,  
540 S., Lefort, V., Lescot, M., et al. 2008. Phylogeny.fr: robust phylogenetic analysis for the  
541 non-specialist. *Nucleic Acids Res*, 36, W465-9.
- 542 Distel, M., Wullimann, M. F. & Koster, R. W. 2009. Optimized Gal4 genetics for permanent  
543 gene expression mapping in zebrafish. *Proc Natl Acad Sci U S A*, 106, 13365-70.
- 544 El-Brolosy, M. A. & Stainier, D. Y. R. 2017. Genetic compensation: A phenomenon in search of  
545 mechanisms. *PLoS Genet*, 13, e1006780.
- 546 Esteve, C., Francescato, L., Tan, P. L., Bouchany, A., De Leusse, C., Marinier, E., Blanchard, A.,  
547 Bourgeois, P., Brochier-Armanet, C., Bruel, A. L., et al. 2018. Loss-of-Function  
548 Mutations in *UNC45A* Cause a Syndrome Associating Cholestasis, Diarrhea, Impaired  
549 Hearing, and Bone Fragility. *Am J Hum Genet*, 102, 364-374.
- 550 Hegan, P. S., Mermall, V., Tilney, L. G. & Mooseker, M. S. 2007. Roles for *Drosophila*  
551 *melanogaster* myosin IB in maintenance of enterocyte brush-border structure and  
552 resistance to the bacterial pathogen *Pseudomonas entomophila*. *Mol Biol Cell*, 18,  
553 4625-36.
- 554 Horne-Badovinac, S., Lin, D., Waldron, S., Schwarz, M., Mbamalu, G., Pawson, T., Jan, Y.,  
555 Stainier, D. Y. & Abdelilah-Seyfried, S. 2001. Positional cloning of heart and soul  
556 reveals multiple roles for PKC lambda in zebrafish organogenesis. *Curr Biol*, 11, 1492-  
557 502.
- 558 Horstick, E. J., Jordan, D. C., Bergeron, S. A., Tabor, K. M., Serpe, M., Feldman, B. & Burgess, H.  
559 A. 2015. Increased functional protein expression using nucleotide sequence features  
560 enriched in highly expressed genes in zebrafish. *Nucleic Acids Res*, 43, e48.
- 561 Iuliano, O., Yoshimura, A., Prosperi, M. T., Martin, R., Knolker, H. J. & Coudrier, E. 2018. Myosin  
562 1b promotes axon formation by regulating actin wave propagation and growth cone  
563 dynamics. *J Cell Biol*.
- 564 Kok, F. O., Shin, M., Ni, C. W., Gupta, A., Grosse, A. S., Van Impel, A., Kirchmaier, B. C., Peterson-  
565 Maduro, J., Kourkoulis, G., Male, I., et al. 2015. Reverse genetic screening reveals poor  
566 correlation between morpholino-induced and mutant phenotypes in zebrafish. *Dev*  
567 *Cell*, 32, 97-108.
- 568 Kolotuev, I., Bumbarger, D. J., Labouesse, M. & Schwab, Y. 2012. Targeted ultramicrotomy: a  
569 valuable tool for correlated light and electron microscopy of small model organisms.  
570 *Methods Cell Biol*, 111, 203-22.
- 571 Komaba, S. & Coluccio, L. M. 2015. Myosin 1b Regulates Amino Acid Transport by Associating  
572 Transporters with the Apical Plasma Membrane of Kidney Cells. *PLoS One*, 10,  
573 e0138012.
- 574 Kwan, K. M., Fujimoto, E., Grabher, C., Mangum, B. D., Hardy, M. E., Campbell, D. S., Parant, J.  
575 M., Yost, H. J., Kanki, J. P. & Chien, C. B. 2007. The Tol2kit: a multisite gateway-based  
576 construction kit for Tol2 transposon transgenesis constructs. *Dev Dyn*, 236, 3088-99.
- 577 Kwon, O., Han, T. S. & Son, M. Y. 2020. Intestinal Morphogenesis in Development,  
578 Regeneration, and Disease: The Potential Utility of Intestinal Organoids for Studying  
579 Compartmentalization of the Crypt-Villus Structure. *Front Cell Dev Biol*, 8, 593969.
- 580 Lee, C. F., Melkani, G. C. & Bernstein, S. I. 2014. The UNC-45 myosin chaperone: from worms  
581 to flies to vertebrates. *Int Rev Cell Mol Biol*, 313, 103-44.

- 582 Lehtimäki, J. I., Fenix, A. M., Kotila, T. M., Balistreri, G., Paavolainen, L., Varjosalo, M., Burnette,  
583 D. T. & Lappalainen, P. 2017. UNC-45a promotes myosin folding and stress fiber  
584 assembly. *J Cell Biol*, 216, 4053-4072.
- 585 Lubarsky, B. & Krasnow, M. A. 2003. Tube morphogenesis: making and shaping biological  
586 tubes. *Cell*, 112, 19-28.
- 587 Mammoto, T. & Ingber, D. E. 2010. Mechanical control of tissue and organ development.  
588 *Development*, 137, 1407-20.
- 589 Martin-Belmonte, F. & Mostov, K. 2008. Regulation of cell polarity during epithelial  
590 morphogenesis. *Curr Opin Cell Biol*, 20, 227-34.
- 591 Mazzolini, R., Dopeso, H., Mateo-Lozano, S., Chang, W., Rodrigues, P., Bazzocco, S., Alazzouzi,  
592 H., Landolfi, S., Hernandez-Losa, J., Andretta, E., et al. 2012. Brush border myosin Ia  
593 has tumor suppressor activity in the intestine. *Proc Natl Acad Sci U S A*, 109, 1530-5.
- 594 Müller, T., Hess, M. W., Schiefermeier, N., Pfaller, K., Ebner, H. L., Heinz-Erian, P., Ponstingl,  
595 H., Partsch, J., Rollinghoff, B., Kohler, H., et al. 2008. MYO5B mutations cause  
596 microvillus inclusion disease and disrupt epithelial cell polarity. *Nat Genet*, 40, 1163-  
597 5.
- 598 Ng, A. N., De Jong-Curtain, T. A., Mawdsley, D. J., White, S. J., Shin, J., Appel, B., Dong, P. D.,  
599 Stainier, D. Y. & Heath, J. K. 2005. Formation of the digestive system in zebrafish: III.  
600 Intestinal epithelium morphogenesis. *Dev Biol*, 286, 114-35.
- 601 Pernier, J., Kusters, R., Bousquet, H., Lagny, T., Morchain, A., Joanny, J. F., Bassereau, P. &  
602 Coudrier, E. 2019. Myosin 1b is an actin depolymerase. *Nat Commun*, 10, 5200.
- 603 Prospero, M. T., Lepine, P., Dingli, F., Paul-Gilloteaux, P., Martin, R., Loew, D., Knolker, H. J. &  
604 Coudrier, E. 2015. Myosin 1b functions as an effector of EphB signaling to control cell  
605 repulsion. *J Cell Biol*, 210, 347-61.
- 606 Revenu, C., Athman, R., Robine, S. & Louvard, D. 2004. The co-workers of actin filaments: from  
607 cell structures to signals. *Nat Rev Mol Cell Biol*, 5, 635-46.
- 608 Revenu, C., Ubelmann, F., Hurbain, I., El-Marjou, F., Dingli, F., Loew, D., Delacour, D., Gilet, J.,  
609 Brot-Laroche, E., Rivero, F., et al. 2012. A new role for the architecture of microvillar  
610 actin bundles in apical retention of membrane proteins. *Mol Biol Cell*, 23, 324-36.
- 611 Reymann, A. C., Boujemaa-Paterski, R., Martiel, J. L., Guerin, C., Cao, W., Chin, H. F., De La Cruz,  
612 E. M., They, M. & Blanchoin, L. 2012. Actin network architecture can determine  
613 myosin motor activity. *Science*, 336, 1310-4.
- 614 Robine, S., Huet, C., Moll, R., Sahuquillo-Merino, C., Coudrier, E., Zweibaum, A. & Louvard, D.  
615 1985. Can villin be used to identify malignant and undifferentiated normal digestive  
616 epithelial cells? *Proc Natl Acad Sci U S A*, 82, 8488-92.
- 617 Rossi, A., Kontarakis, Z., Gerri, C., Nolte, H., Holper, S., Kruger, M. & Stainier, D. Y. 2015. Genetic  
618 compensation induced by deleterious mutations but not gene knockdowns. *Nature*,  
619 524, 230-3.
- 620 Salas-Cortes, L., Ye, F., Tenza, D., Wilhelm, C., Theos, A., Louvard, D., Raposo, G. & Coudrier, E.  
621 2005. Myosin Ib modulates the morphology and the protein transport within multi-  
622 vesicular sorting endosomes. *J Cell Sci*, 118, 4823-32.
- 623 Sidhaye, J., Pinto, C. S., Dharap, S., Jacob, T., Bhargava, S. & Sonawane, M. 2016. The zebrafish  
624 goosepimples/myosin Vb mutant exhibits cellular attributes of human microvillus  
625 inclusion disease. *Mech Dev*, 142, 62-74.
- 626 Thisse, B. & Thisse, C. 2004. Fast Release Clones: A High Throughput Expression Analysis.  
627 *ZFIN Direct Data Submission* (<http://zfin.org/>). .
- 628 Tyska, M. J., Mackey, A. T., Huang, J. D., Copeland, N. G., Jenkins, N. A. & Mooseker, M. S. 2005.  
629 Myosin-1a is critical for normal brush border structure and composition. *Mol Biol Cell*,  
630 16, 2443-57.

631 Wallace, K. N., Akhter, S., Smith, E. M., Lorent, K. & Pack, M. 2005. Intestinal growth and  
632 differentiation in zebrafish. *Mech Dev*, 122, 157-73.

633 Yamada, A., Mamane, A., Lee-Tin-Wah, J., Di Cicco, A., Prevost, C., Levy, D., Joanny, J. F.,  
634 Coudrier, E. & Bassereau, P. 2014. Catch-bond behaviour facilitates membrane  
635 tubulation by non-processive myosin 1b. *Nat Commun*, 5, 3624.

636

637

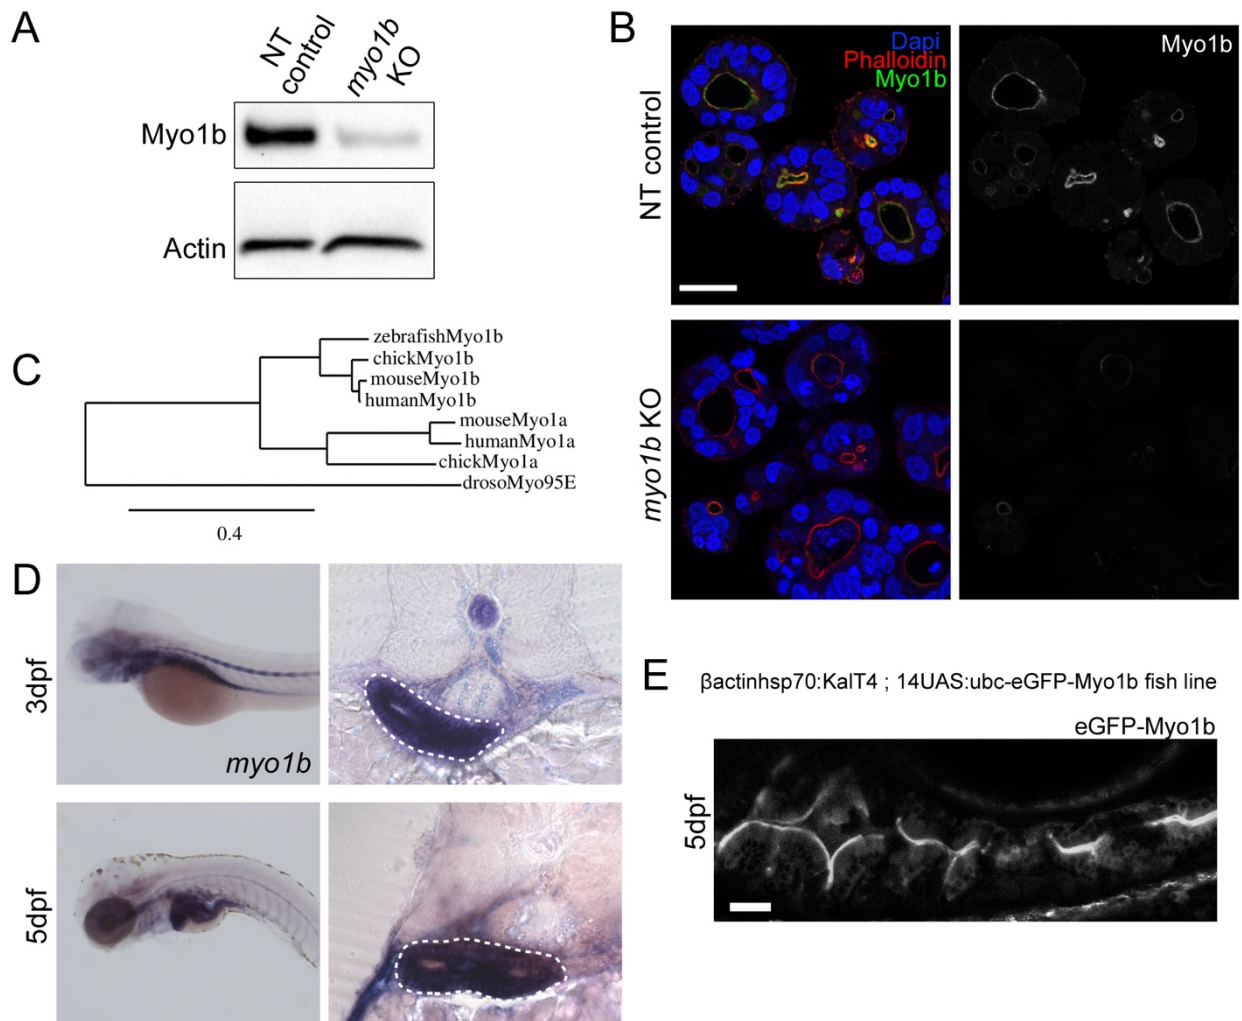

Revenu et al., Figure 1

638

639 **Figure 1**

640 **Myo1b expression and apical localisation in gut epithelial cells.** **A-** Western blot analysis of  
641 Myo1b expression in extracts from non-targeted (NT) control and *myo1b* targeted Caco-2 cells  
642 (KO) using CRISPR/Cas9. **B-** Confocal sections of Caco-2 3D cultures stained for Myo1b, F-actin  
643 (phalloidin) and nuclei (Dapi). **C-** Phylogenetic tree based on protein sequence of zebrafish, chick,  
644 human and mouse Myo1b and Myo1a and drosophila Myosin95E. **D-** In situ hybridization for  
645 *myo1b* transcripts on 3 and 5dpf zebrafish larvae whole mounts (left panel) and cross-sections at  
646 the level of the intestinal bulb (right panels). On sections, the forming intestinal bulb is circled  
647 with white dashed lines. **E-** Live, longitudinal (antero-posterior axis) confocal section of the  
648 intestinal bulb of a 5dpf zebrafish larva expressing the transcription activator KalT4 driving the  
649 expression of the eGFP-Myo1b transgene under the control of an upstream activating sequence  
650 (UAS). The precise construction of the transgenes is annotated in the panel. Scale bars 30 $\mu$ m.

651

652

653

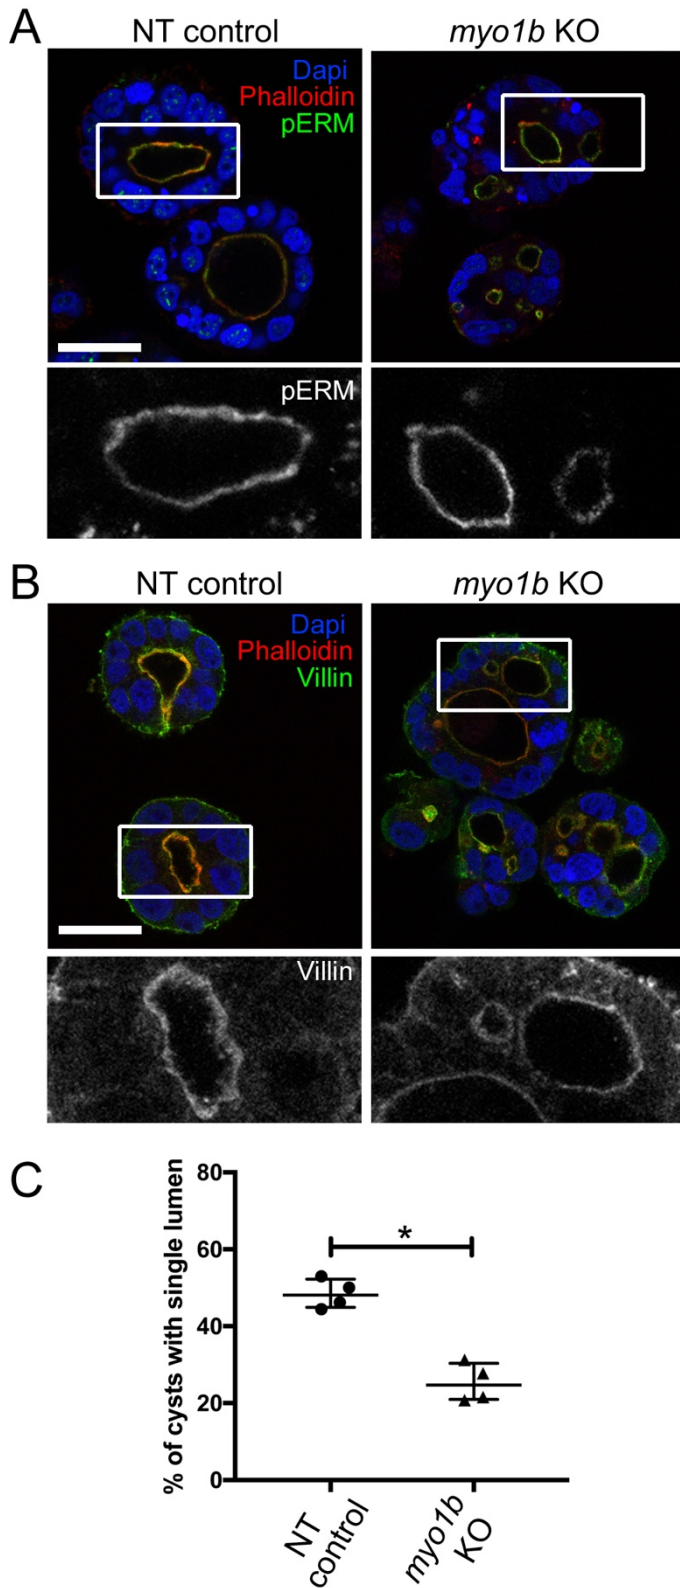

## Figure 2

**Enterocyte 3D cyst organization is affected in the absence of Myo1b despite normal apico-basal polarization.** Confocal sections of NT control and *myo1b* KO Caco-2 3D cultures stained for the apical and microvilli markers phospho-Ezrin (pERM, **A**) and Villin (**B**). F-actin (phalloidin) and nuclei (Dapi) are stained, scale bars 30 $\mu$ m, boxed areas showed in insets are enlarged 2.5x. **C**-Quantification of the percentage of well-formed cysts with a single central lumen in NT control and *myo1b* KO Caco-2 3D cultures. Data represented are median and interquartile range from n=4 replicates, Wilcoxon test, \*p<0.05.

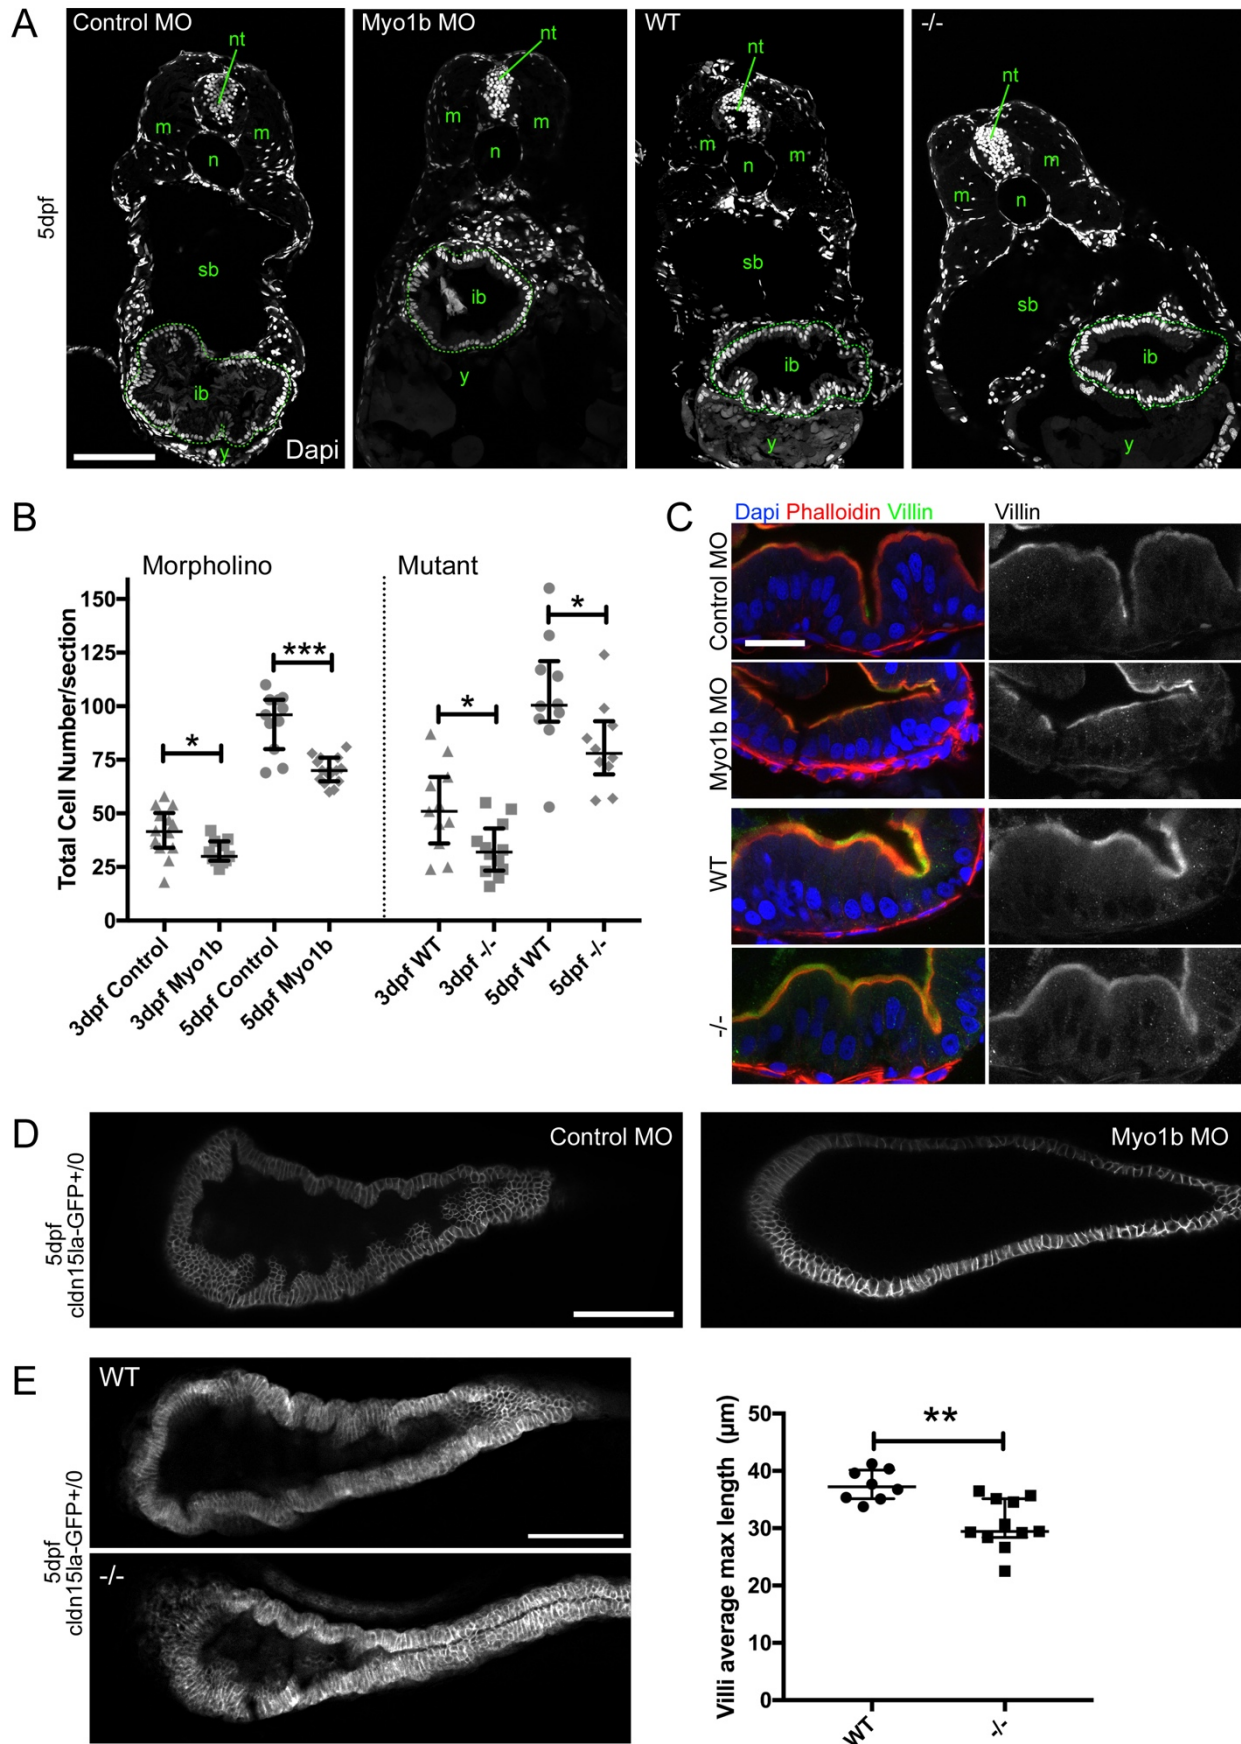

674  
675

Revenu et al., Figure 3

676 **Figure 3**

677 **Myo1b knock-down and knock-out impair intestinal bulb fold development.** **A-** Confocal  
678 single optical sections stained with nuclear labelling (Dapi) of 5dpf larvae injected with control  
679 and Myo1b Morpholinos (MO), and of 5dpf wild-type (WT) and *myo1b*<sup>-/-</sup> (-/-) larvae. ib intestinal  
680 bulb (circled with dashed lines), m muscles, n notochord, nt neural tube, sb swim bladder, y yolk.  
681 Scale bar=100µm. **B-** Quantifications from Dapi stained sections of the total number of cells per  
682 section at 3 and 5dpf in the four conditions. Data represented are median and interquartile range,  
683 n=10 to 15, Wilcoxon test, \*p<0.05, \*\*\*p<0.001. **C-** Confocal optical sections of the intestinal  
684 bulb of 5dpf larvae in the four conditions stained for the microvilli marker Villin, F-actin  
685 (phalloidin) and nuclei (Dapi) showing the preserved apico-basal polarity of enterocytes when  
686 Myo1b is affected. Scale bar 20µm. **D-** Single confocal planes of live 5dpf larvae expressing  
687 Cldn15la-GFP injected with control MO (left) and Myo1b MO (right). Note the flat epithelium in  
688 the Myo1b MO condition. Scale bar=100µm. **E-** Single confocal planes of live 5dpf WT and  
689 *myo1b*<sup>-/-</sup> larvae expressing Cldn15la-GFP and quantification of the average length of the 3 longest  
690 folds per intestinal bulb analysed. Scale bar=100µm. Data presented are median and interquartile  
691 range, n<sub>WT</sub>=8 and n<sub>-/-</sub>=11, Wilcoxon test, \*\*p<0.01.  
692

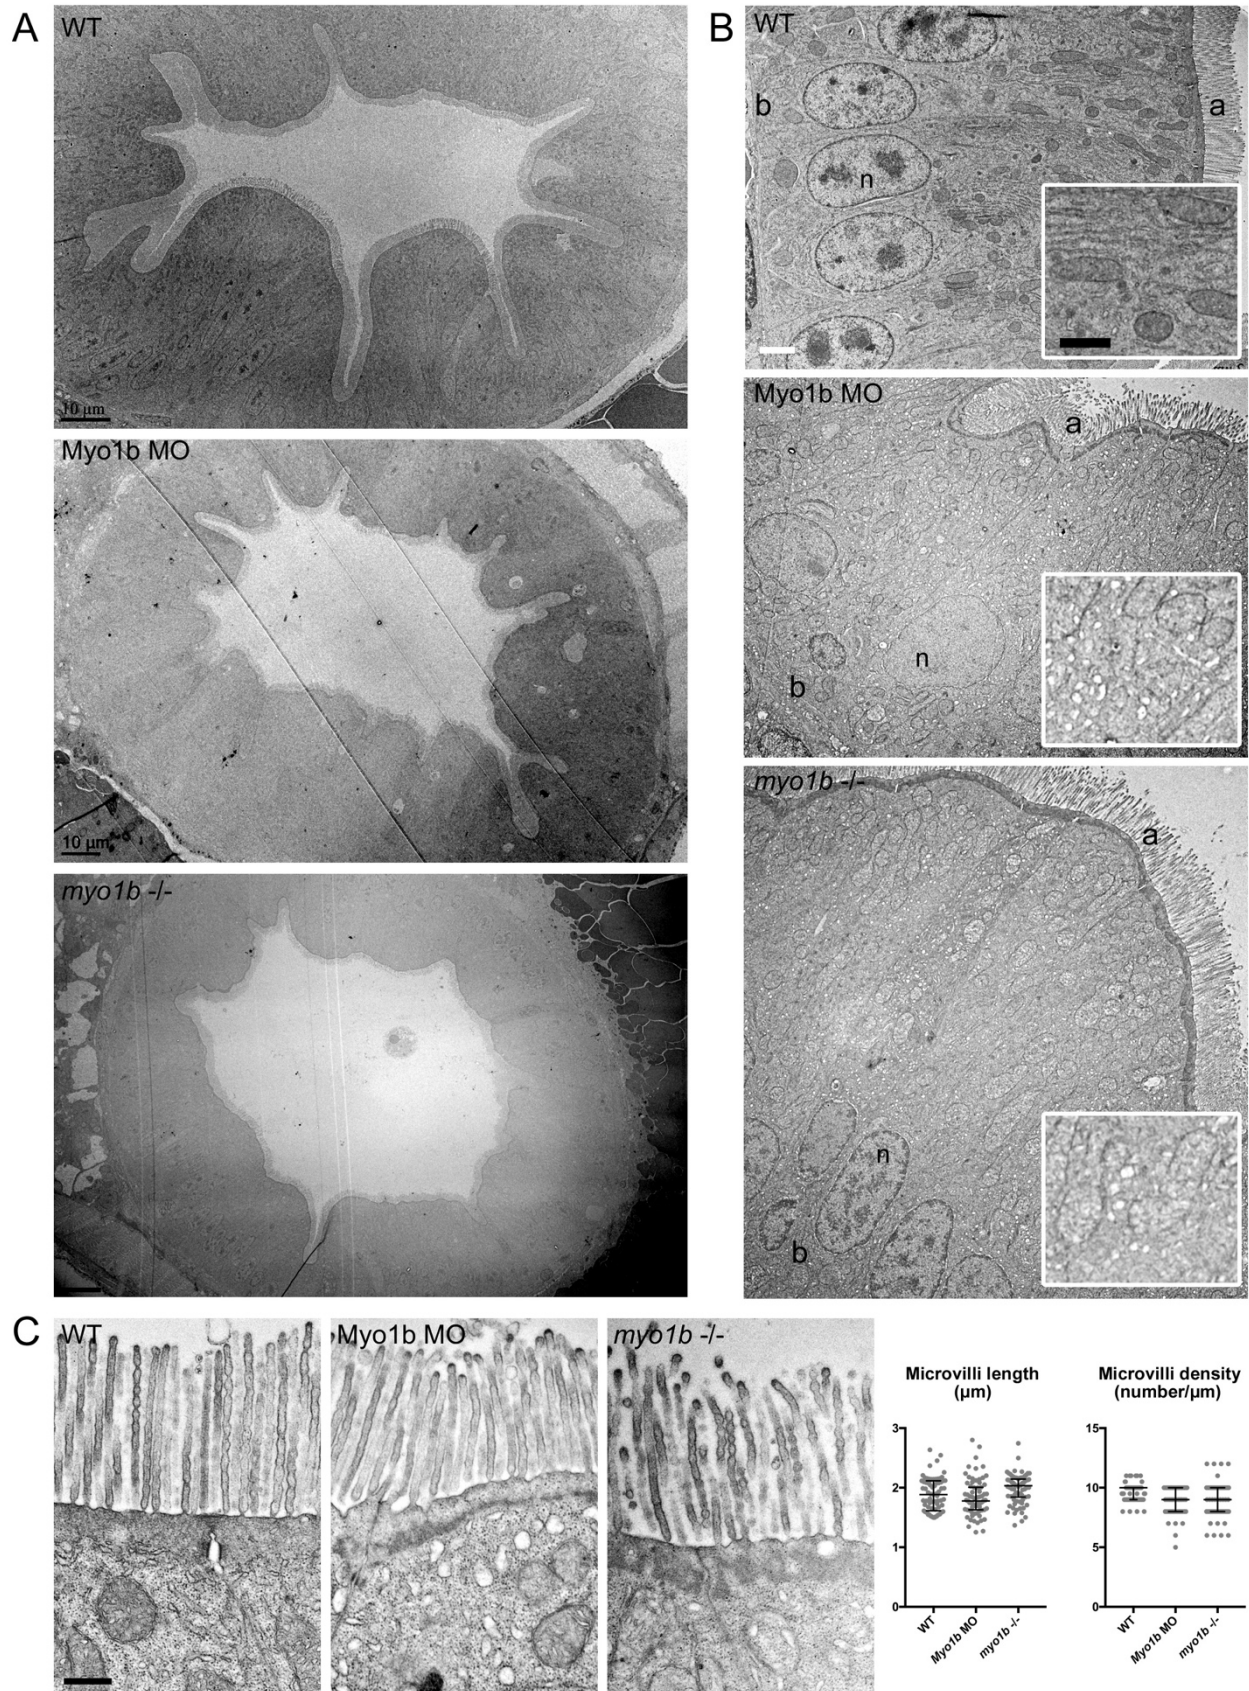

693 Revenu et al., Figure 4

694

695



696 **Figure 4**

697 **Electron Microscopy confirms folding defects and shows affected trafficking.** Transmission  
698 electron micrographs of sections of intestinal bulbs from WT, Myo1b MO and *myo1b*<sup>-/-</sup> 5dpf  
699 larvae presenting a general view of the folds of the epithelium (**A**, scale bars 10 $\mu$ m) and of the  
700 apico-basally polarized enterocytes (**B**, scale bar 2 $\mu$ m ; b basal, a apical, n nuclei). Insets in **B**,  
701 show higher magnifications of the cytoplasm region to highlight the accumulation of vesicles in  
702 Myo1b MO and *myo1b*<sup>-/-</sup> samples, scale bar 1 $\mu$ m. **C**- Transmission electron micrographs of  
703 sections of intestinal bulbs from WT, Myo1b MO and *myo1b*<sup>-/-</sup> 5dpf larvae illustrating the  
704 organization of the brush border, and quantifications of the average length and density of the  
705 intestinal microvilli in the different conditions. Data presented are median and interquartile range,  
706  $n_{\text{length}}=77$ ,  $n_{\text{density}}=75$  per condition. Scale bar 500 nm.

707

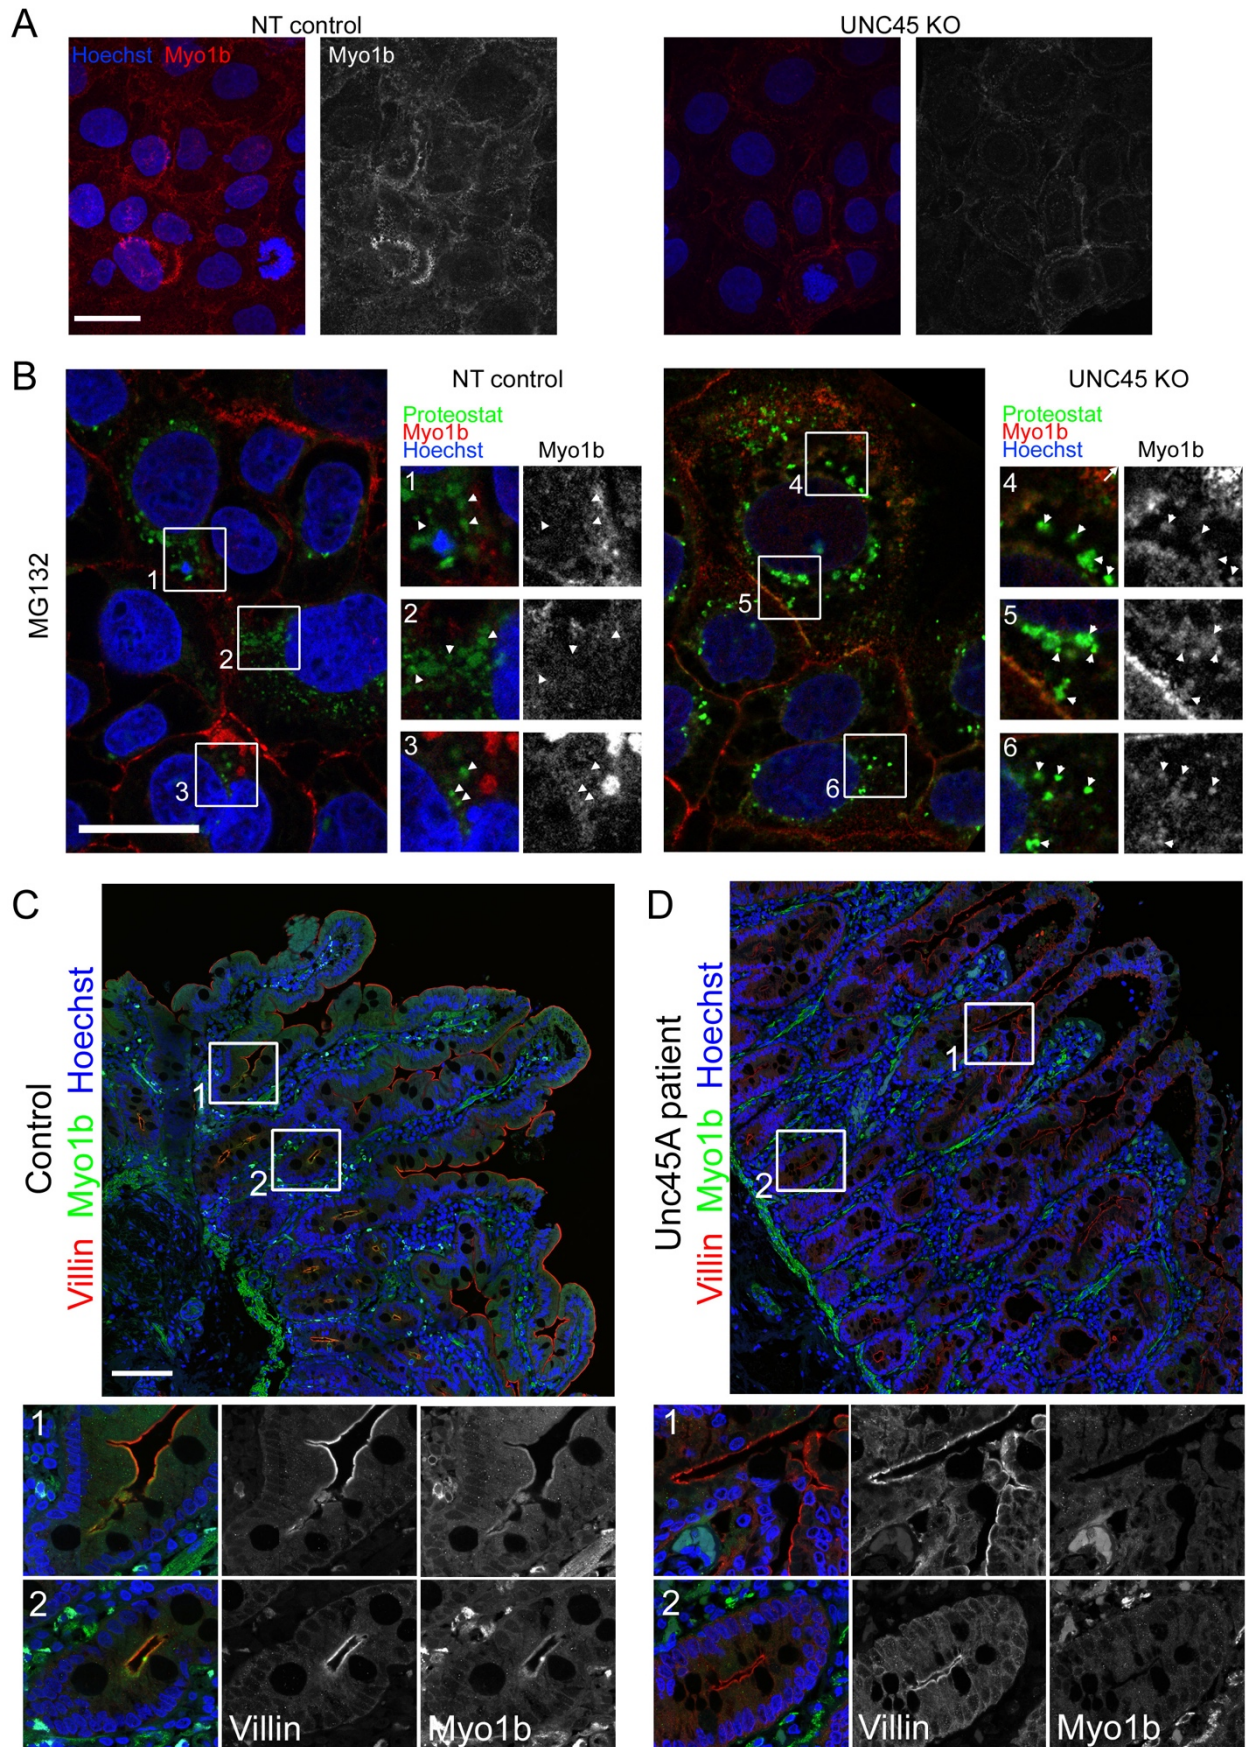

708

709

Revenu et al., Figure 5

710 **Figure 5**

711 **Myo1b expression is destabilized in UNC45A depleted cells and in biopsies from UNC45A**  
712 **mutated patients. A-** Immunohistochemistry analyses of Myo1b in non-targeted (NT) control and  
713 UNC45A deficient (KO) Caco-2 cells show decreased Myo1b levels. Pictures are maximal  
714 projections of confocal stacks, Hoechst labels nuclei, scale bar 30 $\mu$ m. **B-** Confocal sections of NT  
715 control and UNC45A KO Caco-2 cells treated with the proteasome inhibitor MG132 and stained  
716 for Myo1b and the aggresome probe Proteostat. Hoechst labels nuclei, scale bar 30 $\mu$ m. Boxed  
717 areas showed in insets are enlarged 2x, arrowheads point at Proteostat-labelled protein aggregates  
718 and highlight colocalisation with Myo1b proteins in UNC45A KO cells. **C,D-** Confocal sections  
719 of a human biopsy from a healthy patient (control, C) and from a UNC45A LOF patient (D)  
720 immuno-labelled for the microvilli marker Villin and for Myo1b ; Hoechst labels nuclei, scale bar  
721 100 $\mu$ m. Boxed areas showed in insets are enlarged 3x, and highlight the apical localisation of  
722 Myo1b in control tissue (C) at the base of the villi (1) and in crypts (2), which is essentially lost in  
723 the UNC45A LOF tissue (D).

## Supplementary Figures and Table

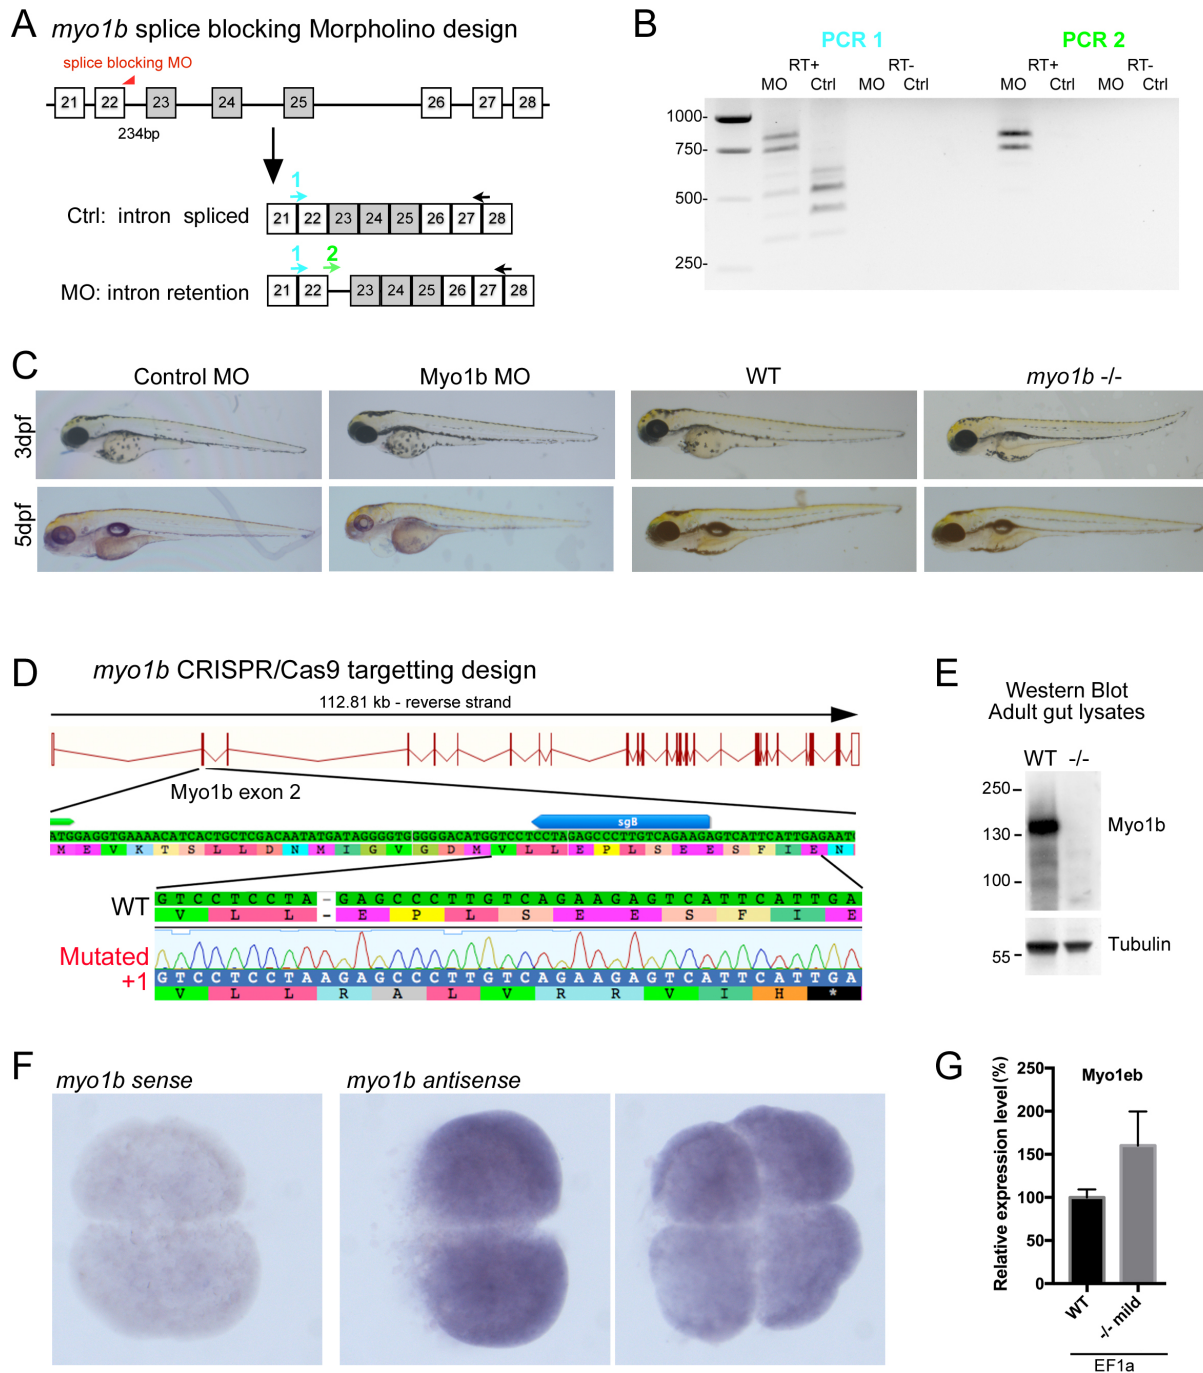

Revenu et al., Figure S1

### Figure S1

**Myo1b Morpholino and CRISPR mutant design and validation.** **A-** Schematics of the design and **B-** DNA gel of the RT-PCR performed to control Myo1b-MO knock-down efficiency. Higher bands amplified in PCR1 MO compared to control and bands amplified in PCR2 MO correspond to Myo1b cDNA retaining the intron targeted by Myo1b-sMO, as verified by sequencing. In B, the multiple bands amplified, both in control and MO conditions, correspond to expected splicing variants of exons 23, 24 and 25 (highlighted in grey)

as checked by sequencing. RT- is the control RT without superscript compared to RT+. **C-** Bright field pictures of 3 and 5dpf larvae presenting the phenotypes of control and Myo1b Morpholinos, WT and *myo1b*<sup>-/-</sup> larvae. **D-** Schematics of CRISPR/Cas9-mediated gene disruption at the *myo1b* genomic locus. The sgRNA (sgB, blue arrow) was targeting exon 2 downstream the start codon (ATG, green arrow). Compared to the WT sequence, the mutated allele displayed an insertion of 1bp generating a frame shift from amino-acid 21 and a premature STOP codon after 29 amino-acids. **E-** Western Blot with antibodies against Myo1b and Tubulin on lysates of dissected guts from WT and <sup>-/-</sup> adults. **F-** Negative control with a sense probe and in situ hybridisation with a *myo1b* anti-sense probe on wild-type embryos at 2 and 4 cell-stages showing maternal contribution for *myo1b* mRNA. **G-** RT-QPCR of *myo1eb* expression at 3dpf with EF1a used as reference gene, normalised on expression of the WT samples. Shown are mean and sem (WT=100.0±9.2, <sup>-/-</sup> =160.1±39.5 , n=6).

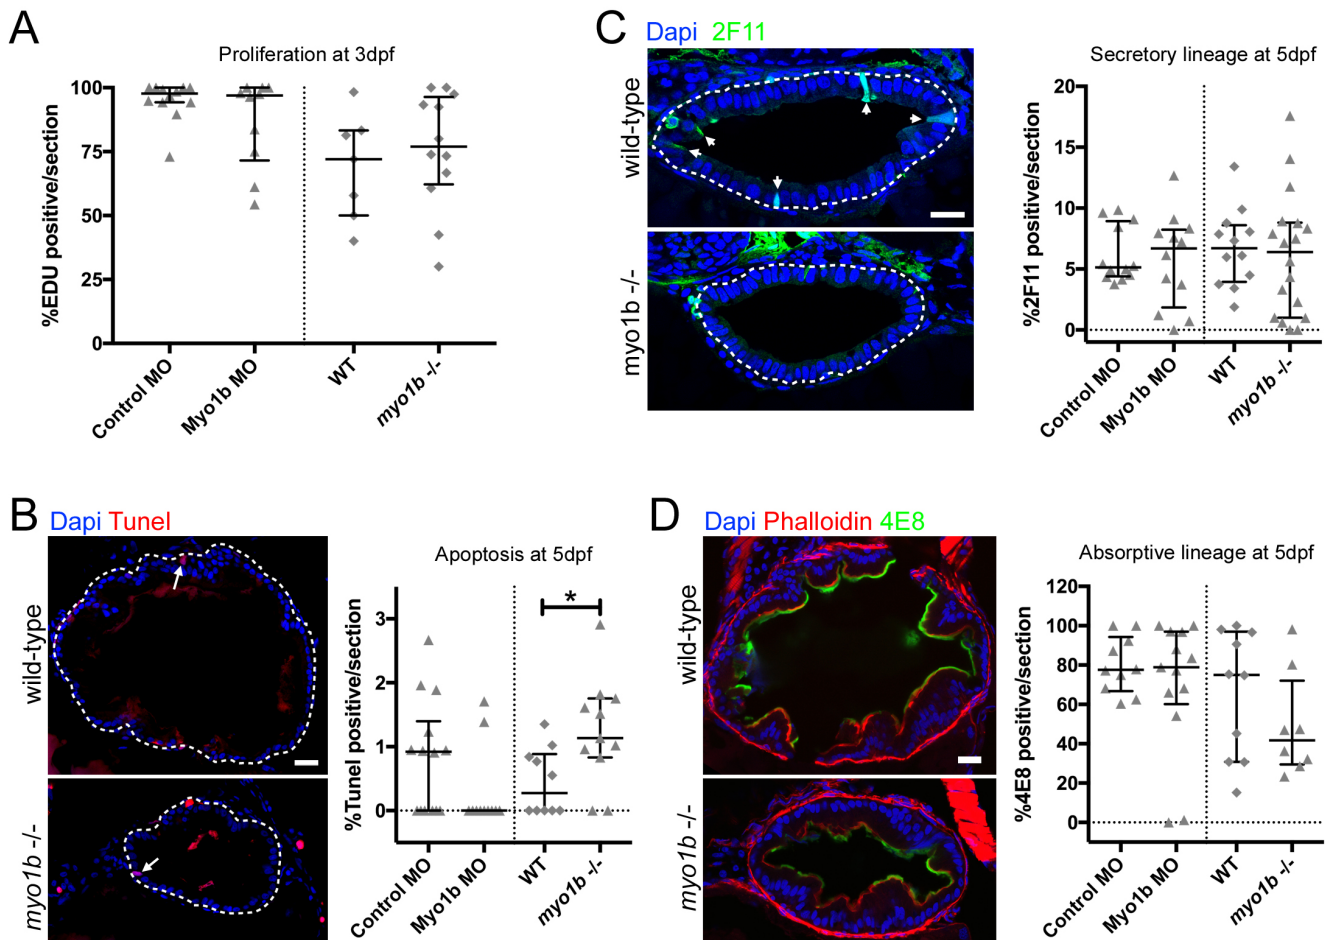

Revenu et al., Figure S2

### Figure S2

**Proliferation, apoptosis and differentiation are essentially unaffected in Myo1b MO and mutant conditions.** **A-** Quantifications from EDU and Dapi stained sections of the proportion of cells in S-phase at 3dpf do not reveal significant differences in the proliferative rate of Control (n=12) vs Myo1b MO (n=10) and of WT (n=7) vs *myo1b*<sup>-/-</sup> (n=12) samples. **B-** Confocal sections of intestinal bulbs stained for apoptosis (Tunel, red) at 5dpf in WT and *myo1b*<sup>-/-</sup> samples and quantifications of the proportion of apoptotic cells in the four conditions (Control n=14, Myo1b MO n=11; WT n=10 ; *myo1b*<sup>-/-</sup> n=11). **C, D-** Confocal sections of intestinal bulbs stained for differentiation markers in WT and *myo1b*<sup>-/-</sup> samples and quantifications of the proportion of differentiated cells in the four conditions. At 5dpf, neither differentiation of the secretory lineage (**C** - 2F11, Control n=12, Myo1b MO n=12; WT n=12 ; *myo1b*<sup>-/-</sup> n=18) nor differentiation of the absorptive lineage (**D** - 4E8, Control n=10, Myo1b MO n=13; WT n=10 ; *myo1b*<sup>-/-</sup> n=8) are significantly altered. For all quantifications, data represented are median and interquartile range, Wilcoxon test, \*p<0.05. For confocal images, nuclei are counterstained with Dapi (blue), bars=20µm.

| Rank | Accession | Description                                                  | MW [kDa] | Coverage % | #Unique Peptides | #PSMs |
|------|-----------|--------------------------------------------------------------|----------|------------|------------------|-------|
| 1    | P46735    | Unconventional myosin-Ib<br>OS=Mus musculus<br>[MYO1B_MOUSE] | 128,483  | 65,31      | 102              | 633   |
| 2    | Q99KD5    | Protein unc-45 homolog A<br>OS=Mus musculus<br>[UN45A_MOUSE] | 103,3818 | 22,14      | 24               | 53    |

**Table S1**

**Mass spectrometry result of the GFP-Myo1b pull down assay.** UNC45A ranks second, directly after Myo1b. MW, molecular weight; #Unique Peptides, number of distinct peptide sequences identified; #PSMs (peptide spectrum matches) total number of identified peptide sequences for the protein.
